# Supplementary material
Source: PubMed Central journal article supplement (PMC7716714)

Figure S1. Six human OSCC cell lines were exposed to increasing concentrations of ZA (0-20  $\mu\text{M}$ ) for 4 days, and their viabilities were determined by MTT assays. OSCC, oral/oropharyngeal squamous cell carcinoma; ZA, zoledronic acid.

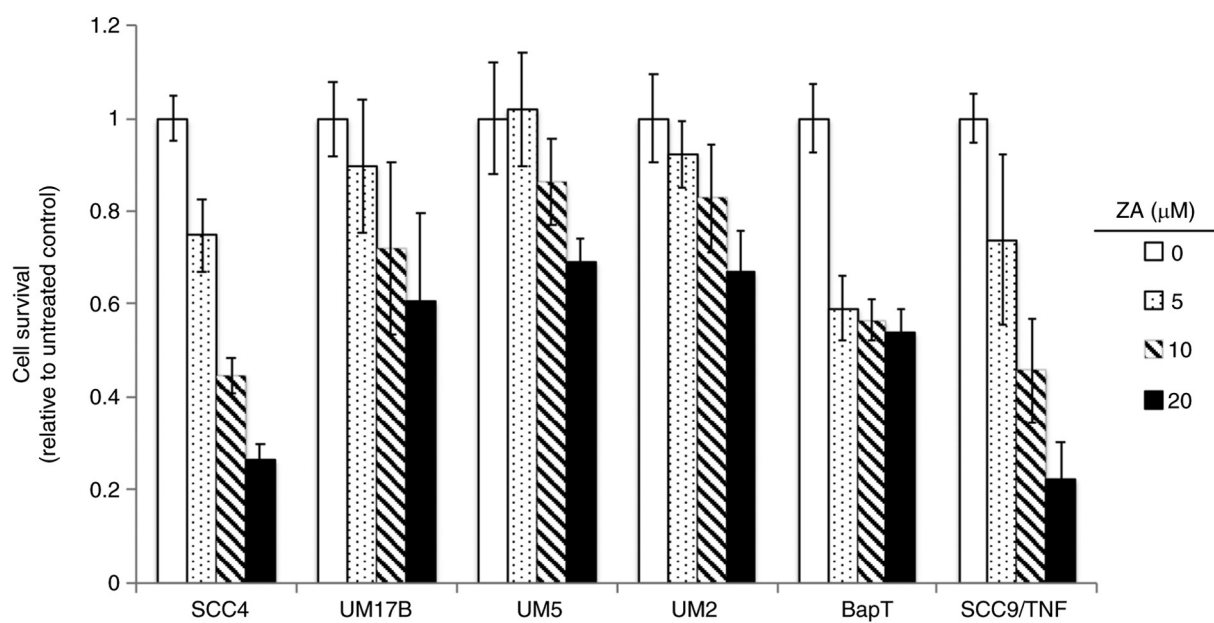

Figure S2. The expression of 19 cytokines was assessed in untreated control and ZA-treated SCC4 cells by quantitative PCR. ZA, zoledronic acid; IL, interleukin; IFN, interferon; TNF, tumor necrosis factor; TGF, transforming growth factor; CCL, chemokine (C-C motif) ligand 3; VEGF, vascular endothelial growth factor; MMP, matrix metallopeptidase.

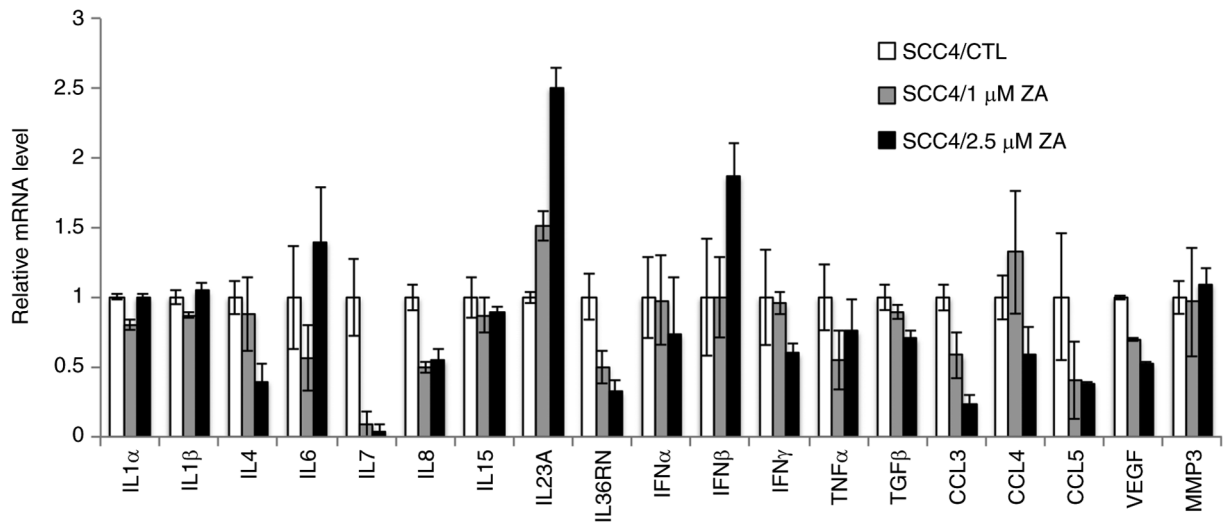

Supplement: Supplementary_Data.pdf [file Supplementary_Data.pdf]
